# Supplementary material for: Patterns in Nonopioid Pain Medication Prescribing After the Release of the 2016 Guideline for Prescribing Opioids for Chronic Pain
Source: PubMed Central journal article supplement (PMC9187961; doi:10.1001/jamanetworkopen.2022.16475), 2022-06-10

## Supplemental Online Content

Goldstick JE, Guy GP, Losby JL, Baldwin GT, Myers MG, Bohnert ASB. Patterns in nonopioid pain medication prescribing after the release of the 2016 Guideline for Prescribing Opioids for Chronic Pain. *JAMA Netw Open*. 2022;5(6):e2216475. doi:10.1001/jamanetworkopen.2022.16475

**eTable 1.** Generic Drug Names Used in Identifying Non-Opioid Prescriptions

**eTable 2.** Generic Names of Opioid Prescriptions Identified by NDC Code Within the 2020 CDC Opioid NDC and Oral MME Conversion File

**eTable 3.** ICD-9 & ICD-10 Codes Used to Indicate Clinical Characteristics

**eTable 4.** Percent Receiving Non-Opioid Pain Medication Prescriptions During Follow-Up in Each Cohort, and Stratified by Demographic Characteristics; in the Post-Guideline Period (2016-2018) and Differences Between the Observed Rate and That Predicted From the Pre-Guideline Trend

**eTable 5.** Percent Receiving Non-Opioid Pain Medication Prescriptions During Follow-Up in Each Cohort, and Stratified by Baseline Clinical Characteristics; in the Post-Guideline Period (2016-2018) and Differences Between the Observed Rate and That Predicted From the Pre-Guideline Trend

**eFigure 1.** Schematic Diagram of the Sequential Cohorts

**eFigure 2.** Total Number Eligible for Each Cohort, and How Many Were Deleted Due to the Continuous Enrollment Requirement, the Age 18+ Requirement, and the Cancer Exclusion

This supplemental material has been provided by the authors to give readers additional information about their work.

**eTable 1.** Generic Drug Names Used in Identifying Non-Opioid Prescriptions

| <b>Analgesics/Antipyretics</b>                 | <b>Nonsteroidal Anti-Inflammatory Drugs</b> |
|------------------------------------------------|---------------------------------------------|
| Acetaminophen                                  | Al Hydroxide/Mg Trisilicate/Phenylbutazone  |
| Acetaminophen/Aspirin/Caffeine                 | Antipyrine/Benzocaine/Glycerin              |
| Acetaminophen/Butalbital                       | Aspirin                                     |
| Acetaminophen/Butalbital/Caffeine              | Aspirin/Butalbital/Caffeine                 |
| Acetaminophen/Caffeine                         | Bromfenac Sodium                            |
| Acetaminophen/Caffeine/Magnesium Salicylate    | Celecoxib                                   |
| Acetaminophen/Calcium Carbonate                | Choline Magnesium Trisalicylate             |
| Acetaminophen/Magnesium Salicylate             | Diclofenac                                  |
| Acetaminophen/Phenyltoloxamine Citrate         | Diclofenac Potassium                        |
| APAP/Ca Carbonate/Mg Carbonate/Mg Oxide        | Diclofenac Sodium                           |
| APAP/Caff/Magnesium Sal/Phenyltoloxamine Cit   | Diclofenac Sodium/Misoprostol               |
| APAP/Caff/Phenyltoloxamine Cit/Salicylamide    | Diflunisal                                  |
| APAP/Phenyltoloxamine Cit/Salicylamide         | Esomeprazole Magnesium/Naproxen             |
| <b><u>Anticonvulsants</u></b>                  | Etodolac                                    |
| Carbamazepine                                  | Fenoprofen Calcium                          |
| Gabapentin                                     | Flurbiprofen                                |
| Gabapentin Enacarbil                           | Ibuprofen                                   |
| Oxcarbazepine<br>Pregabalin                    | Indomethacin                                |
| <b><u>Antidepressants</u></b>                  | Indomethacin Sodium                         |
| Amitriptyline Hydrochloride                    | Ketoprofen                                  |
| Amoxapine                                      | Magnesium Salicylate                        |
| Clomipramine Hydrochloride                     | Meclofenamate Sodium                        |
| Desipramine Hydrochloride                      | Mefenamic Acid                              |
| Desvenlafaxine                                 | Meloxicam                                   |
| Desvenlafaxine Succinate                       | Nabumetone                                  |
| Doxepin Hydrochloride                          | Naproxen                                    |
| Duloxetine Hydrochloride                       | Naproxen Sodium                             |
| Imipramine Hydrochloride                       | Naproxen Sodium/Sumatriptan Succinate       |
| Imipramine Pamoate                             | Oxaprozin                                   |
| Levomilnacipran Hydrochloride                  | Oxyphenbutazone                             |
| Milnacipran Hydrochloride                      | Phenylbutazone                              |
| Milnacipran Hydrochloride;Milnacipran Hydrochl | Piroxicam                                   |
| Nortriptyline Hydrochloride                    | Rofecoxib                                   |
|                                                | Salsalate                                   |
| Protriptyline Hydrochloride                    | Sulindac                                    |
| Trimipramine Maleate                           | Tolmetin Sodium                             |
| Venlafaxine Hydrochloride                      |                                             |

List of 29,202 NDC codes used to index prescription records available upon request.

**eTable 2.** Generic Names of Opioid Prescriptions Identified by NDC Code Within the 2020 CDC Opioid NDC and Oral MME Conversion File

| Generic Name                                                                        |                                                  |
|-------------------------------------------------------------------------------------|--------------------------------------------------|
| A.p.c. W/codeine                                                                    | Belladonna Extract/Opium                         |
| APAP/Butalbital/Caff/Codeine Phos                                                   | Buprenorphine                                    |
| Acetaminophen/Caffeine/Dihydrocodeine Bitartrate                                    | Buprenorphine Hydrochloride                      |
| Acetaminophen/Codeine Phosphate                                                     | Buprenorphine/Naloxone                           |
| Acetaminophen/Hydrocodone Bitartrate                                                | Buprenorphine/naloxone                           |
| Acetaminophen/Oxycodone Hydrochloride                                               | Butorphanol Tartrate                             |
| Acetaminophen/Tramadol Hydrochloride                                                | Codeine Phosphate                                |
| Acetaminophen/butalbital/codeine Phosphate                                          | Codeine Sulfate                                  |
| Acetaminophen/caffeine/dihydrocodeine Bitartrate                                    | Dihydrocodeine/apap/caffeine                     |
| Acetaminophen/codeine Phosphate                                                     | Fentanyl                                         |
| Acetaminophen/hydrocodone Bitartrate                                                | Fentanyl Citrate                                 |
| Acetaminophen/meperidine Hydrochloride                                              | Hydrocodone Bitartrate                           |
| Acetaminophen/oxycodone Hydrochloride                                               | Hydrocodone Bitartrate/Ibuprofen                 |
| Acetaminophen/pentazocine Hydrochloride                                             | Hydrocodone Bitartrate/Ibuprofen                 |
| Acetaminophen/propoxyphene Hydrochloride                                            | Hydromorphone Hydrochloride                      |
| Acetaminophen/propoxyphene Napsylate                                                | Ibuprofen/Oxycodone Hydrochloride                |
| Acetaminophen/tramadol Hydrochloride                                                | Ibuprofen/oxycodone Hydrochloride                |
| Apap/butalbital/caff/codeine Phos                                                   | Levomethadyl Acetate Hydrochloride               |
| Asa/oxycodone Hcl/oxycodone Terephthalate                                           | Levorphanol Tartrate                             |
| Aspirin (buffered)/codeine Phosphate                                                | Meperidine Hydrochloride                         |
| Aspirin/Butalbital/Caffeine/Codeine Phosphate                                       | Methadone Hydrochloride                          |
| Aspirin/Carisoprodol/Codeine Phosphate                                              | Morphine Sulfate                                 |
| Aspirin/Codeine Phosphate                                                           | Morphine Sulfate/naltrexone Hydrochloride        |
| Aspirin/butalbital/caffeine/codeine Phosphate                                       | Naloxone Hydrochloride/pentazocine Hydrochloride |
| Aspirin/caffeine/dihydrocodeine Bitartrate                                          | Oxycodone                                        |
| Aspirin/caffeine/propoxyphene Hydrochloride                                         | Oxycodone Hydrochloride                          |
| Aspirin/carisoprodol/codeine Phosphate                                              | Oxymorphone Hydrochloride                        |
| Aspirin/codeine Phosphate                                                           | Propoxyphene Hydrochloride                       |
| Aspirin/hydrocodone Bitartrate                                                      | Propoxyphene Napsylate                           |
| Aspirin/oxycodone Hydrochloride                                                     | Tapentadol Hydrochloride                         |
| Aspirin/pentazocine Hydrochloride                                                   | Tramadol Hydrochloride                           |
| Belladonna Alkaloids/opium Alkaloids                                                |                                                  |
| List of 15,299 NDC codes used to index prescription records available upon request. |                                                  |

**eTable 3.** ICD-9 & ICD-10 Codes Used to Indicate Clinical Characteristics

| <b>Pain Category</b>   | <b>ICD-9 Codes</b>                                 | <b>ICD-10 Codes</b>                                                                                                                                                                                                                                   |
|------------------------|----------------------------------------------------|-------------------------------------------------------------------------------------------------------------------------------------------------------------------------------------------------------------------------------------------------------|
| Osteoarthritis         | 715, 731, 732                                      | M15, M16-M19, M89.4                                                                                                                                                                                                                                   |
| Fibromyalgia           | 72.91                                              | M79.7                                                                                                                                                                                                                                                 |
| Back/Neck Pain         | 720-723, 724, 737, 738.2, 738.4-738.5, 739.1-739.3 | A18.01, M08.1, M25.78, M40-M41, M43.0-M43.2, M43.6, M43.8-M43.9, M45, M46.0-M46.1, M46.4-M46.5, M46.8-M46.9, M47, M48.0-M48.3, M48.8-M48.9, M49-M51, M53, M54, M62.830, M67.88, M95.3, M96.1-M96.5, M99.01-M99.03, M99.2-M99.7, M99.81, M99.83-M99.84 |
| Non-Migraine Headache  | 307.81, 339, 784.0                                 | G44, R51                                                                                                                                                                                                                                              |
| <b>Covariates</b>      | <b>ICD-9 Codes</b>                                 | <b>ICD-10 Codes</b>                                                                                                                                                                                                                                   |
| Substance Use Disorder | 303, 304, 305.0, 305.2-305.9                       | F101, F102, F111, F112, F121, F122, F131, F132, F141, F142, F151, F152, F161, F162, F181, F182, F191, F192                                                                                                                                            |
| Mood Disorder          | 296, 300.4, 311                                    | F30-F39                                                                                                                                                                                                                                               |
| Anxiety                | 300.0                                              | F41, F42                                                                                                                                                                                                                                              |

**eTable 4.** Percent Receiving Non-Opioid Pain Medication Prescriptions During Follow-Up in Each Cohort, and Stratified by Demographic Characteristics; in the Post-Guideline Period (2016-2018) and Differences Between the Observed Rate and That Predicted From the Pre-Guideline Trend

|                               | Total                         | Gender                        |                             | Race                          |                             | Insurance                   |                             |
|-------------------------------|-------------------------------|-------------------------------|-----------------------------|-------------------------------|-----------------------------|-----------------------------|-----------------------------|
|                               |                               | F                             | M                           | White                         | Other                       | Commercial Insurance        | Medicare Advantage          |
| Cohort 1                      | 1,184,601<br>(20.6%)          | 734,800 (24.2%)               | 449,554<br>(16.6%)          | 795,152 (20.6%)               | 308,428<br>(22.1%)          | 843,533<br>(19.4%)          | 341,068<br>(24.3%)          |
| Cohort 2                      | 1,225,256<br>(20.6%)          | 758,639 (24.3%)               | 466,388<br>(16.6%)          | 814,817 (20.5%)               | 327,395<br>(22.2%)          | 821,671<br>(19.0%)          | 403,585<br>(25.1%)          |
| Cohort 3                      | 1,101,489<br>(20.4%)          | 676,587 (24.1%)               | 424,721<br>(16.4%)          | 727,517 (20.2%)               | 296,679<br>(22.1%)          | 706,482<br>(18.4%)          | 395,007<br>(25.1%)          |
| Cohort 4                      | 1,135,525<br>(20.1%)          | 696,537 (23.7%)               | 438,851<br>(16.2%)          | 725,929 (19.6%)               | 317,292<br>(22.0%)          | 711,065<br>(18.0%)          | 424,460<br>(25.0%)          |
| Cohort 5<br>(actual-<br>pred) | 1,280,462<br>(20.8%)<br>+0.8% | 791,252 (24.4%)<br>+0.8%      | 489,116<br>(16.8%)<br>+0.7% | 812,786 (20.2%)<br>+0.8%      | 359,829<br>(22.9%)<br>+0.9% | 762,346<br>(18.5%)<br>+1.0% | 518,116<br>(25.5%)<br>+0.1% |
| Cohort 6<br>(actual-<br>pred) | 1,514,936<br>(22.0%)<br>+2.1% | 943,115 (25.9%)<br>+2.5%      | 571,768<br>(17.6%)<br>+1.6% | 937,860 (21.4%)<br>+2.3%      | 434,711<br>(24.9%)<br>+2.9% | 798,406<br>(18.3%)<br>+1.3% | 716,530<br>(28.2%)<br>+2.6% |
| Cohort 7<br>(actual-<br>pred) | 1,687,585<br>(22.2%)<br>+2.5% | 1,050,565<br>(26.0%)<br>+2.8% | 636,968<br>(17.8%)<br>+1.9% | 1,003,476<br>(21.6%)<br>+2.8% | 473,690<br>(25.3%)<br>+3.4% | 848,816<br>(18.4%)<br>+1.8% | 838,769<br>(28.0%)<br>+2.1% |

Notes: (actual-pred) are the observed levels minus the linear prediction; all entries are statistically significantly different from 0% at  $p < 0.05$ .

Each cell shows counts receiving non-opioid pain medication prescriptions in each cohort, and in each group shown; parenthetical percentages underneath each count show the percent of that group, in that cohort, that received non-opioid pain medication prescriptions (e.g., 23.9% underneath 659,738 means that 659,738 comprised 23.9% of female patients in the 2012 cohort).

The “Other” Race category does not include those with Race labeled as “Unknown”, which was approximately 10% of all values, across years.

There were 4,215 missing values in the gender variable across years; those were included in the other columns, but neither gender column.

**eTable 5.** Percent Receiving Non-Opioid Pain Medication Prescriptions During Follow-Up in Each Cohort, and Stratified by Baseline Clinical Characteristics; in the Post-Guideline Period (2016-2018) and Differences Between the Observed Rate and That Predicted From the Pre-Guideline Trend

|                               | Total                         | <u>Chronic Pain</u>         |                               | <u>Opioid Exposure</u>      |                               | <u>Substance Use Disorder</u> |                               | <u>Anxiety Disorder</u>     |                               | <u>Mood Disorder</u>        |                               |
|-------------------------------|-------------------------------|-----------------------------|-------------------------------|-----------------------------|-------------------------------|-------------------------------|-------------------------------|-----------------------------|-------------------------------|-----------------------------|-------------------------------|
|                               |                               | Yes                         | No                            | Yes                         | No                            | Yes                           | No                            | Yes                         | No                            | Yes                         | No                            |
| Cohort 1                      | 1,184,601<br>(20.6%)          | 384,718<br>(40.4%)          | 799,883<br>(16.7%)            | 489,248<br>(36.9%)          | 695,353<br>(15.7%)            | 30,005<br>(38.6%)             | 1,154,596<br>(20.3%)          | 134,638<br>(37.1%)          | 1,049,963<br>(19.5%)          | 201,306<br>(42.2%)          | 983,295<br>(18.6%)            |
| Cohort 2                      | 1,225,256<br>(20.6%)          | 415,415<br>(40.5%)          | 809,841<br>(16.5%)            | 506,801<br>(37.4%)          | 718,455<br>(15.7%)            | 34,078<br>(39.3%)             | 1,191,178<br>(20.3%)          | 152,708<br>(37.2%)          | 1,072,548<br>(19.4%)          | 215,881<br>(42.2%)          | 1,009,375<br>(18.6%)          |
| Cohort 3                      | 1,101,489<br>(20.4%)          | 379,321<br>(40.4%)          | 722,168<br>(16.2%)            | 455,024<br>(37.9%)          | 646,465<br>(15.4%)            | 34,802<br>(40.5%)             | 1,066,687<br>(20.0%)          | 147,700<br>(37.5%)          | 953,789<br>(19.0%)            | 202,773<br>(42.2%)          | 898,716<br>(18.2%)            |
| Cohort 4                      | 1,135,525<br>(20.1%)          | 387,469<br>(39.2%)          | 748,056<br>(16.1%)            | 451,057<br>(37.7%)          | 684,468<br>(15.4%)            | 39,379<br>(40.3%)             | 1,096,146<br>(19.7%)          | 157,611<br>(36.5%)          | 977,914<br>(18.7%)            | 211,193<br>(41.1%)          | 924,332<br>(18.0%)            |
| Cohort 5<br>(actual-<br>pred) | 1,280,462<br>(20.8%)<br>+0.8% | 455,480<br>(40.1%)<br>+1.0% | 824,982<br>(16.4%)<br>+0.6%   | 503,463<br>(40.0%)<br>+1.9% | 776,999<br>(15.9%)<br>+0.7%   | 50,362<br>(42.6%)<br>+1.4%    | 1,230,100<br>(20.4%)<br>+0.8% | 199,347<br>(37.7%)<br>+1.0% | 1,081,115<br>(19.2%)<br>+0.7% | 248,365<br>(42.2%)<br>+1.0% | 1,032,097<br>(18.6%)<br>+0.8% |
| Cohort 6<br>(actual-<br>pred) | 1,514,936<br>(22.0%)<br>+2.1% | 578,409<br>(43.0%)<br>+4.2% | 936,527<br>(16.9%)<br>+1.3%   | 606,254<br>(42.8%)<br>+4.4% | 908,682<br>(16.6%)<br>+1.5%   | 66,623<br>(45.8%)<br>+4.0%    | 1,448,313<br>(21.5%)<br>+2.1% | 275,392<br>(39.9%)<br>+3.4% | 1,239,544<br>(20.0%)<br>+1.7% | 310,155<br>(44.6%)<br>+3.7% | 1,204,781<br>(19.4%)<br>+1.9% |
| Cohort 7<br>(actual-<br>pred) | 1,687,585<br>(22.2%)<br>+2.5% | 668,410<br>(42.7%)<br>+4.3% | 1,019,175<br>(16.9%)<br>+1.5% | 644,984<br>(43.9%)<br>+5.1% | 1,042,601<br>(17.0%)<br>+2.0% | 77,721<br>(45.6%)<br>+3.2%    | 1,609,864<br>(21.6%)<br>+2.5% | 324,478<br>(39.6%)<br>+3.3% | 1,363,107<br>(20.1%)<br>+2.1% | 360,477<br>(44.3%)<br>+3.8% | 1,327,108<br>(19.5%)<br>+2.2% |

Notes: (actual-pred) are the observed levels minus the linear prediction; all entries are statistically significantly different from 0% at  $p < 0.05$ .

Each cell shows counts receiving non-opioid pain medication prescriptions in each cohort, and in each group shown; parenthetical percentages underneath each count show the percent of that group, in that cohort, that received non-opioid pain medication prescriptions (e.g., 23.9% underneath 659,738 means that 659,738 comprised 23.9% of female patients in the 2012 cohort).

Opioid Exposure is defined as having no opioid prescription claims during the 12-month baseline period for that cohort, and Chronic Pain is defined as having no claims history indicating chronic pain in the past year.

**eFigure 1.** Schematic Diagram of the Sequential Cohorts

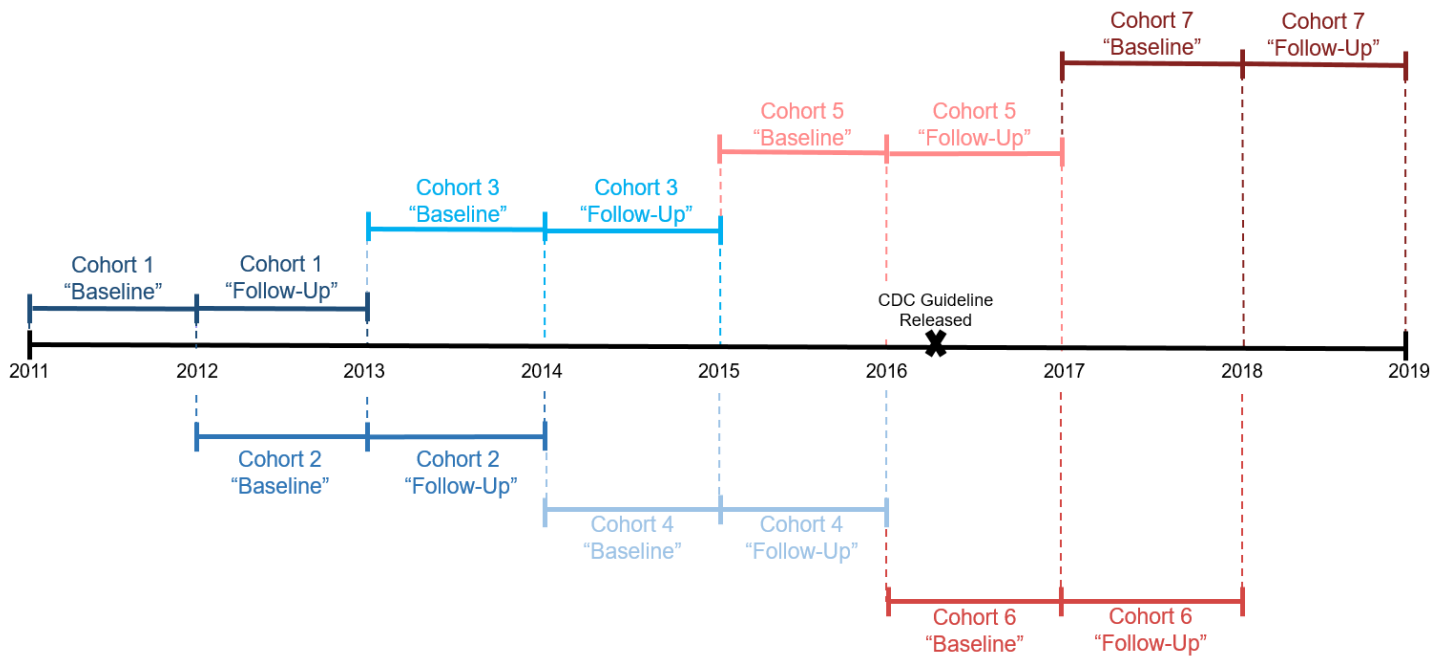



**eFigure 2.** Total Number Eligible for Each Cohort, and How Many Were Deleted Due to the Continuous Enrollment Requirement, the Age 18+ Requirement, and the Cancer Exclusion

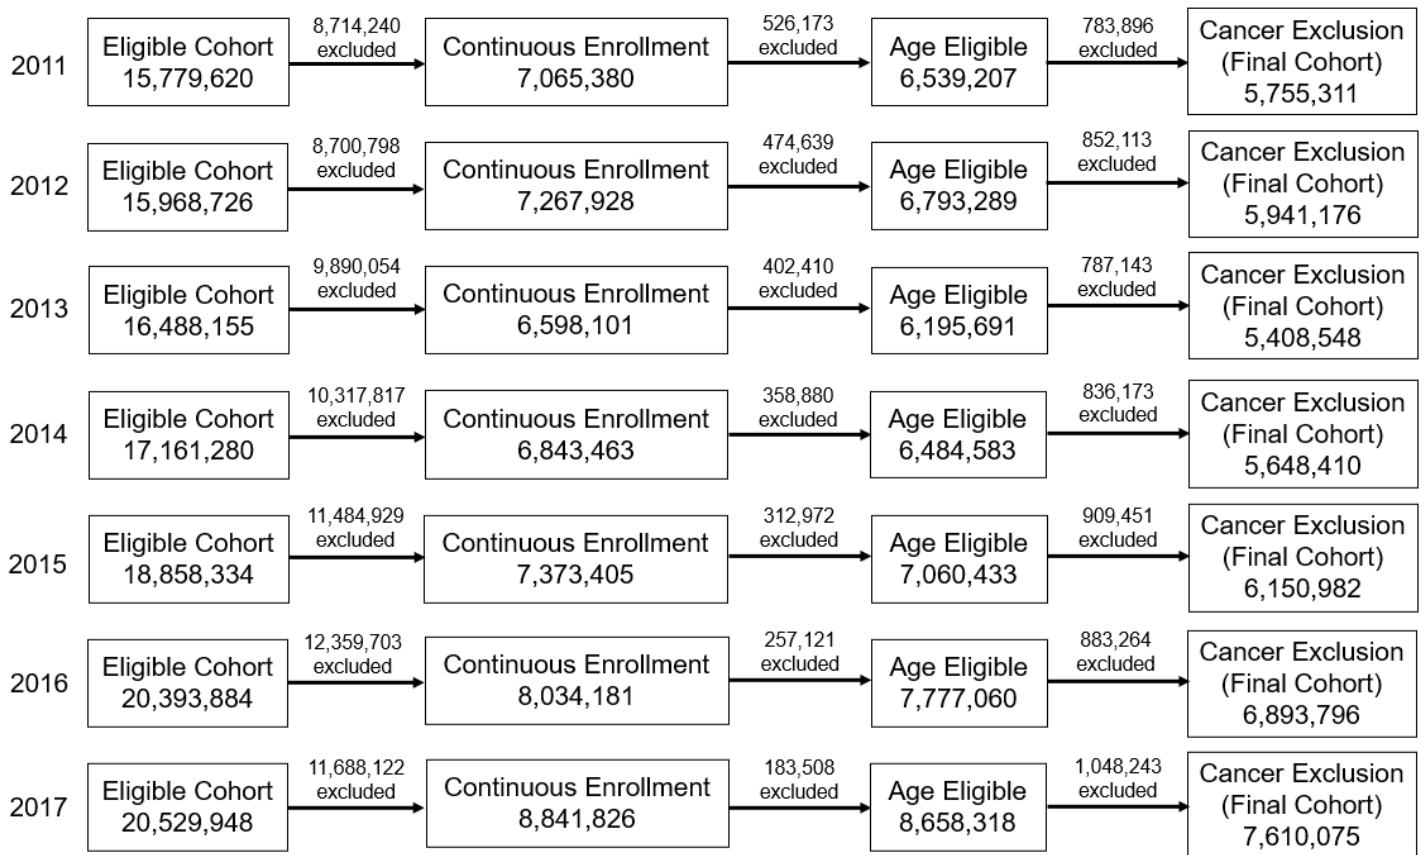

Supplement: jamanetwopen-e2216475-s001.pdf [file jamanetwopen-e2216475-s001.pdf]
